# Supplementary material
Source: PubMed Central journal article supplement (PMC2937335)

**Supplemental Figure 1. Fluorescent microscopy of UU-A076.5.** Focus was either on conidiospores (A, B, C) or mycelium (D, E, F). Images are from brightfield (A, D), GFP-fluorescence (reflecting *mtdA* expression, B, E) or dTomato-fluorescence (reflecting *mpdA* expression, C, F). The yellow fluorescence in B and E is caused by leakage of dTomato fluorescence through the GFP filter.

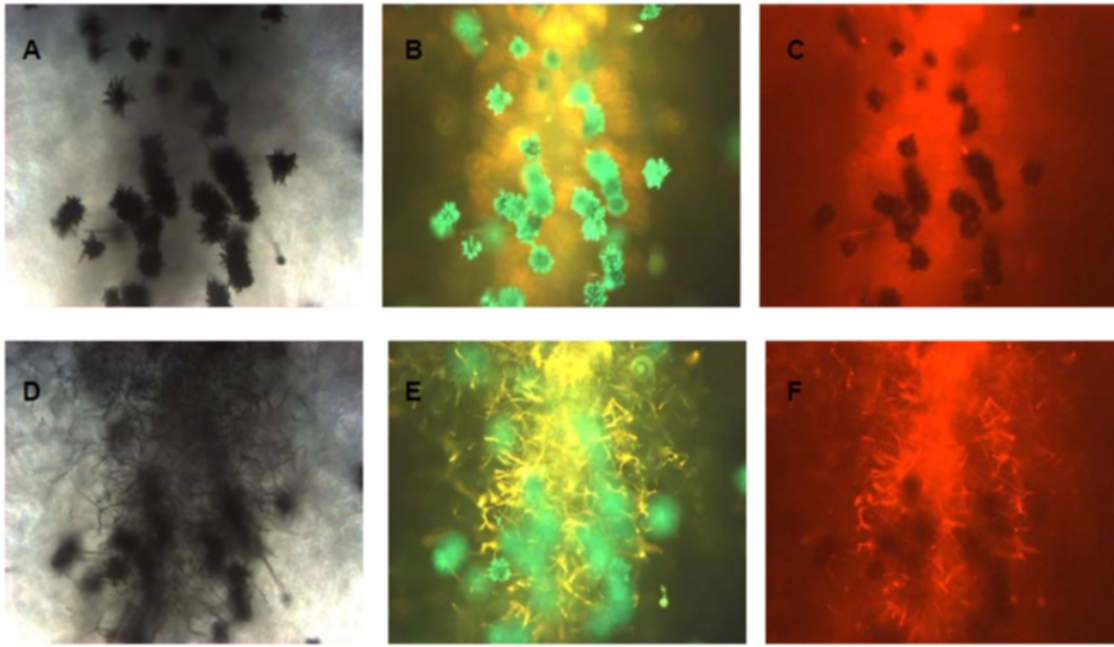

Supplement: supp_9_9_1398__1.pdf [file supp_9_9_1398__1.pdf]
